# Supplementary material for: VEGF knockdown enhances radiosensitivity of nasopharyngeal carcinoma by inhibiting autophagy through the activation of mTOR pathway
Source: PubMed Central journal article supplement (PMC7531011; doi:10.1038/s41598-020-73310-x), 2020-10-01

**VEGF knockdown enhances radiosensitivity of nasopharyngeal carcinoma by inhibiting autophagy through the activation of mTOR pathway**

Li Chen<sup>1,2\*</sup>, Guoxiang Lin<sup>1\*</sup>, Kaihua Chen<sup>2</sup>, Fangzhu Wan<sup>2</sup>, Renba Liang<sup>2</sup>, Yongchu Sun<sup>2</sup>, Xishan Chen<sup>2</sup>, Xiaodong Zhu<sup>1,2,3</sup>

<sup>1</sup>Department of Oncology, Affiliated Wuming Hospital of Guangxi Medical University, Nanning, Guangxi, 530010, People's Republic of China; <sup>2</sup>Department of Radiation Oncology, Guangxi Medical University Cancer Hospital, Nanning, Guangxi 530021, People's Republic of China; <sup>3</sup>Guangxi Key Laboratory of Early Prevention and Treatment for Regional High Frequency Tumor, Guangxi Medical University, Nanning, Guangxi 530021, People's Republic of China.

**Corresponding author:** Xiaodong Zhu, Department of Radiation Oncology, Guangxi Medical University Cancer Hospital, 71 He Di Road, Nanning 530021, People's Republic of China. Tel: +86 771 533 1466. E-mail address: zhuxdonggxmu@126.com.

\* These authors contributed equally to this work.

**Supplementary Figure.S1**

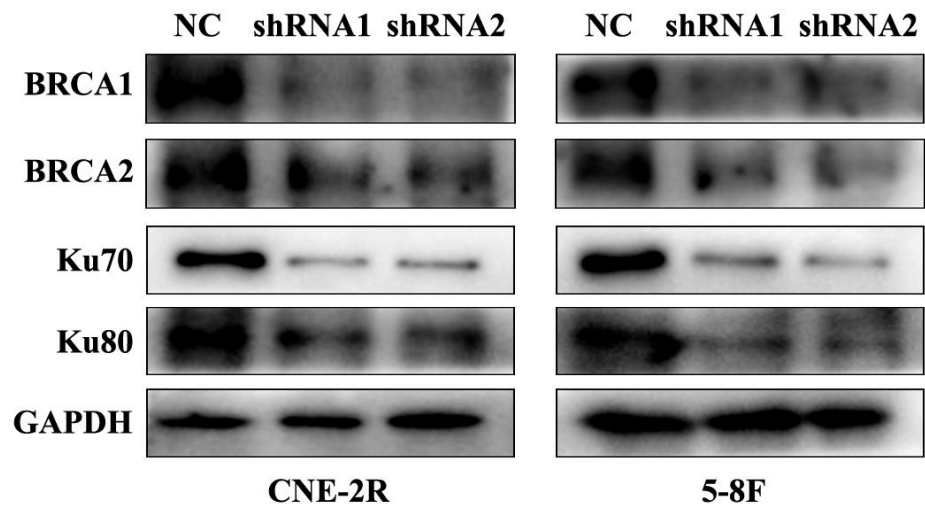

**Supplementary Figure. S1.** VEGF knockdown decreased the proteins of DNA repair pathways in NPC cells.

# Supplementary Figure.S2

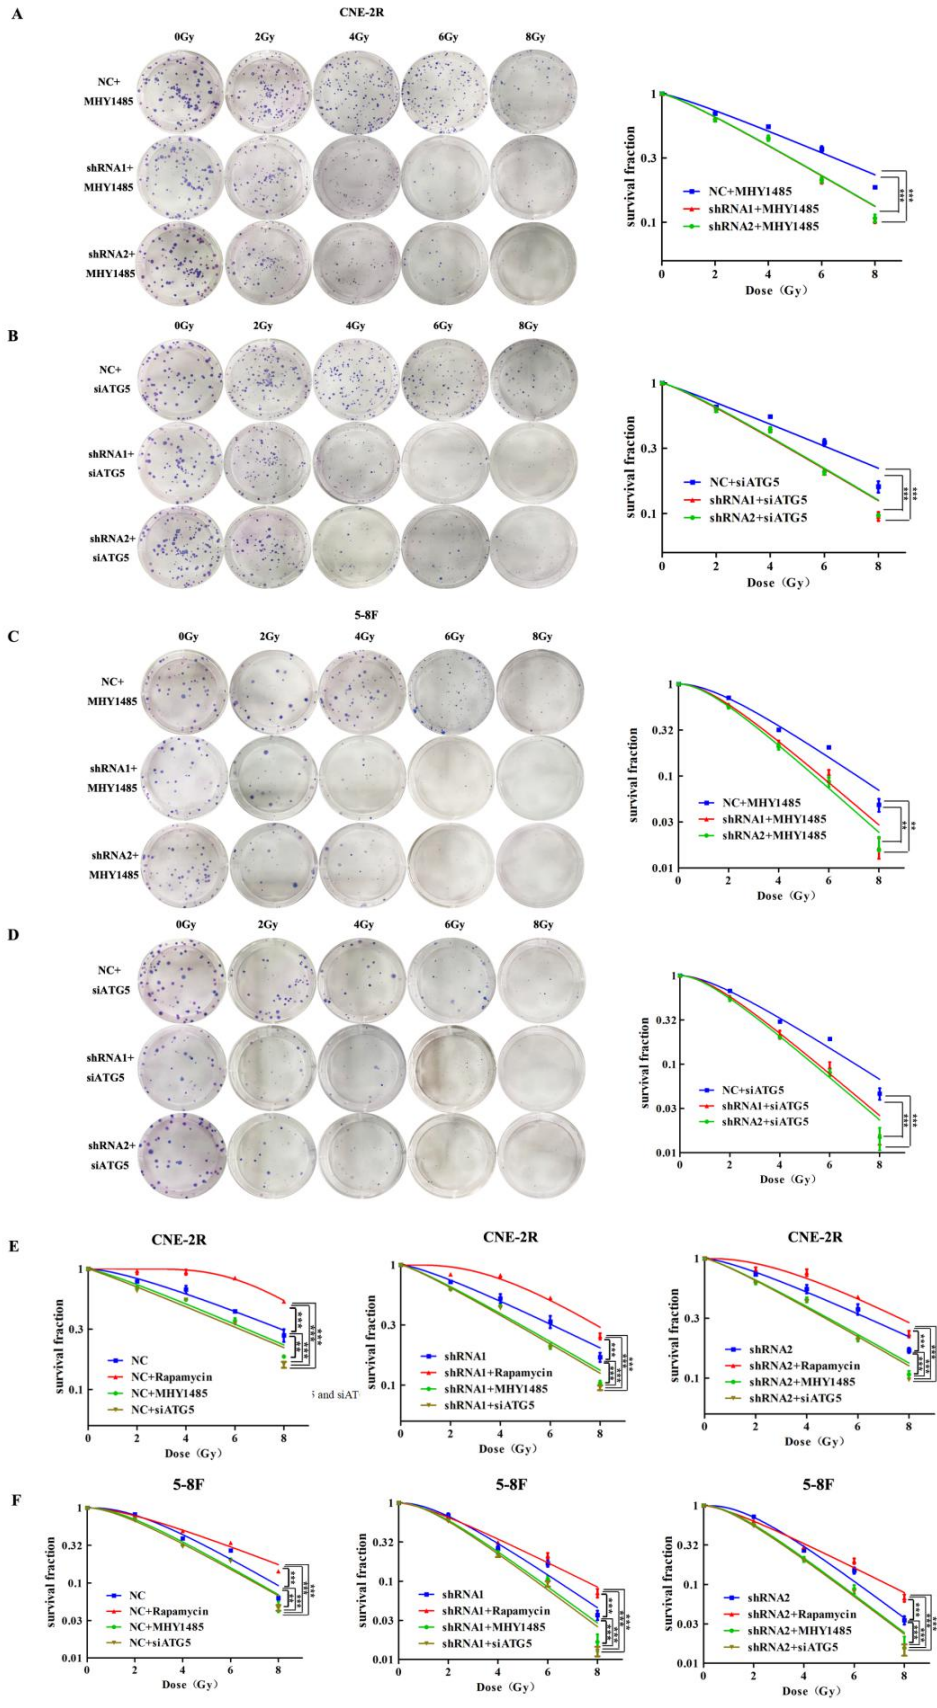

**Supplementary Figure.S2** Inhibition of autophagy enhanced the radiosensitivity in NPC cells. (A-D) The number and size of colonies were analyzed by clonogenic assay after irradiation in NPC cells treated with MHY1485 and siATG5 (A, B: CNE-2R; C, D: 5-8F). (E-F) The curves showed the survival fraction of each group was detected by clonogenic assay after irradiation in NPC cells treated with or without Rapamycin, MHY1485 and siATG5 (E: CNE-2R; F: 5-8F). \* $p < 0.05$ , \*\* $p < 0.01$  and \*\*\* $p < 0.001$ .

### Supplementary Figure.S3

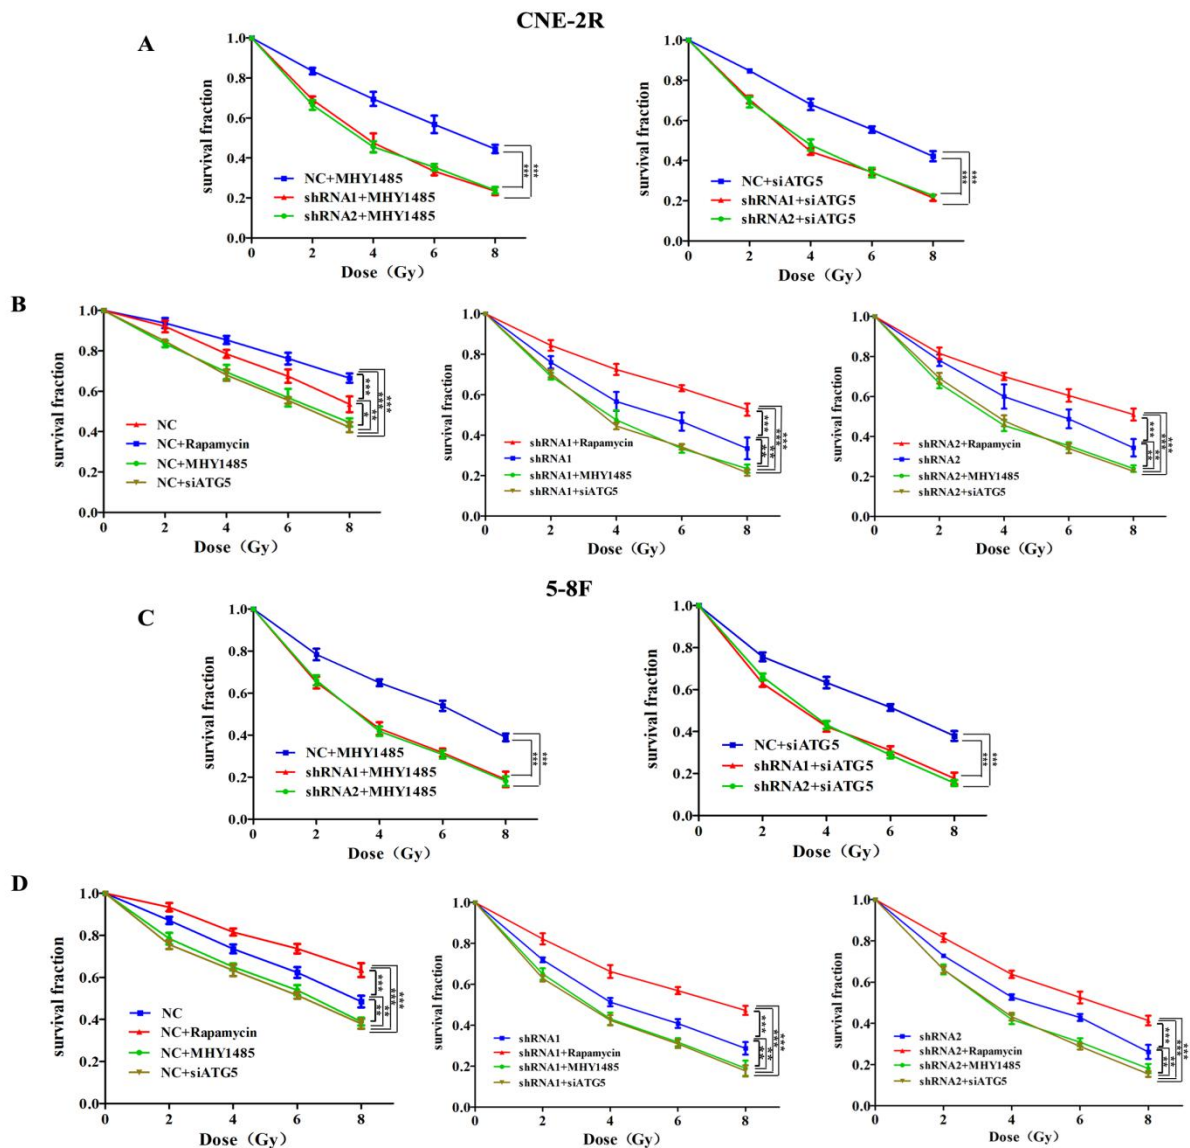

**Supplementary Figure.S3** The inhibition of autophagy enhanced the radiosensitivity in NPC cells. (A,C) Cell proliferation were detected by CCK-8 assay after irradiation of NPC cells treated with MHY1485 and siATG5 (A: CNE-2R; C: 5-8F). (B,D) The curves showed the survival fraction of each group was detected by CCK-8 assay after irradiation in NPC cells treated with or without Rapamycin, MHY1485 and siATG5 (B: CNE-2R; D: 5-8F). \* $p < 0.05$ , \*\* $p < 0.01$  and \*\*\* $p < 0.001$ .

Supplementary Figure.S4

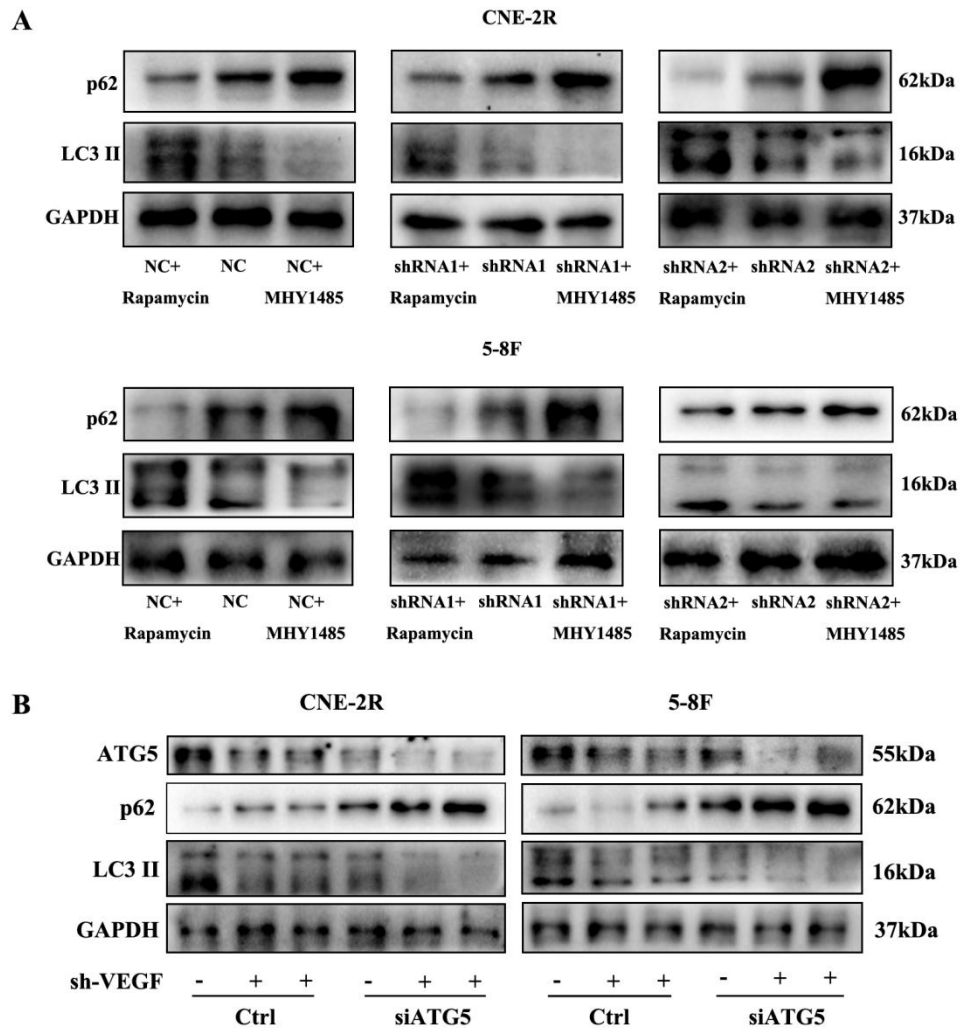

Supplementary Figure.S4 VEGF knockdown inhibited autophagy in NPC cells. (A,B) The expression of LC3 II and p62 proteins in NPC cells after treatment with Rapamycin and MHY1485. (C) The expression of LC3 II, p62 and atg5 proteins in NPC cells after treatment with siATG5.

Supplementary Table S1. Radiobiological parameters of the three groups (Mean±SD)

| Cell lines (CNE-2R) | D <sub>0</sub> | Dq          | SF <sub>2</sub> |
|---------------------|----------------|-------------|-----------------|
| NC+Rapamycin        | 2.836±0.871    | 7.257±0.189 | 0.964±0.063     |
| ShRNA1+Rapamycin    | 3.084±0.366    | 4.685±0.343 | 0.833±0.023     |
| ShRNA2+Rapamycin    | 3.717±0.681    | 3.729±0.836 | 0.807±0.036     |
| <i>p</i>            | 0.324          | 0.000       | 0.01            |

D<sub>0</sub> is the average lethal dose, which is the dose required to hit each cell once. Dq is a quasi-threshold dose, which refers to the ability to repair sublethal injury. SF<sub>2</sub> is the survival fraction at 2 Gy radiation dose. *P*<0.05 is supposed to indicate statistical significance.

**Supplementary Table S2.** Radiobiological parameters of the three groups (Mean±SD)

| Cell lines (5-8F) | D <sub>0</sub> | Dq          | SF <sub>2</sub> |
|-------------------|----------------|-------------|-----------------|
| NC+Rapamycin      | 2.945±0.216    | 2.865±0.085 | 0.866±0.019     |
| ShRNA1+Rapamycin  | 2.46±0.187     | 2.225±0.202 | 0.776±0.03      |
| ShRNA2+Rapamycin  | 2.468±0.083    | 2.048±0.158 | 0.748±0.024     |
| <i>p</i>          | 0.021          | 0.002       | 0.003           |

D<sub>0</sub> is the average lethal dose, which is the dose required to hit each cell once. Dq is a quasi-threshold dose, which refers to the ability to repair sublethal injury. SF<sub>2</sub> is the survival fraction at 2 Gy radiation dose. *P*<0.05 is supposed to indicate statistical significance.

**Supplementary Table S3.** Radiobiological parameters of the three groups (Mean±SD)

| Cell lines (CNE-2R) | D <sub>0</sub> | D <sub>q</sub> | SF <sub>2</sub> |
|---------------------|----------------|----------------|-----------------|
| NC+MHY1485          | 4.882±0.047    | 1.023±0.204    | 0.704±0.007     |
| ShRNA1+MHY1485      | 3.569±0.066    | 0.848±0.176    | 0.628±0.014     |
| ShRNA2+MHY1485      | 3.580±0.353    | 0.856±0.390    | 0.633±0.025     |
| <i>p</i>            | 0              | 0.685          | 0.003           |

D<sub>0</sub> is the average lethal dose, which is the dose required to hit each cell once. D<sub>q</sub> is a quasi-threshold dose, which refers to the ability to repair sublethal injury. SF<sub>2</sub> is the survival fraction at 2 Gy radiation dose. *P*<0.05 is supposed to indicate statistical significance.

**Supplementary Table S4.** Radiobiological parameters of the three groups (Mean±SD)

| Cell lines (CNE-2R) | D <sub>0</sub> | D <sub>q</sub> | SF <sub>2</sub> |
|---------------------|----------------|----------------|-----------------|
| NC+siATG5           | 5.054±0.341    | 0.455±0.393    | 0.657±0.025     |
| ShRNA1+siATG5       | 3.507±0.049    | 0.767±0.059    | 0.618±0.007     |



|               |             |             |             |
|---------------|-------------|-------------|-------------|
| ShRNA2+siATG5 | 3.496±0.310 | 0.828±0.449 | 0.626±0.025 |
| <i>p</i>      | 0.001       | 0.42        | 0.13        |

$D_0$  is the average lethal dose, which is the dose required to hit each cell once.  $D_q$  is a quasi-threshold dose, which refers to the ability to repair sublethal injury.  $SF_2$  is the survival fraction at 2 Gy radiation dose.  $P<0.05$  is supposed to indicate statistical significance.

**Supplementary Table S5.** Radiobiological parameters of the three groups (Mean±SD)

| Cell lines (5-8F) | $D_0$       | $D_q$       | $SF_2$      |
|-------------------|-------------|-------------|-------------|
| NC+MHY1485        | 4.882±0.047 | 1.023±0.204 | 0.704±0.007 |
| ShRNA1+MHY1485    | 3.569±0.066 | 0.848±0.176 | 0.628±0.014 |
| ShRNA2+MHY1485    | 3.580±0.353 | 0.856±0.390 | 0.633±0.025 |
| <i>p</i>          | 0           | 0.685       | 0.003       |

$D_0$  is the average lethal dose, which is the dose required to hit each cell once.  $D_q$  is a quasi-threshold dose, which refers to the ability to repair sublethal injury.  $SF_2$  is the survival fraction at 2 Gy radiation dose.  $P<0.05$  is supposed to indicate statistical significance.

**Supplementary Table S6.** Radiobiological parameters of the three groups (Mean±SD)

| Cell lines (5-8F) | D <sub>0</sub> | D <sub>q</sub> | SF <sub>2</sub> |
|-------------------|----------------|----------------|-----------------|
| NC+siATG5         | 2.405±0.108    | 1.556±0.114    | 0.673±0.015     |
| ShRNA1+siATG5     | 1.821±0.111    | 1.380±0.132    | 0.581±0.021     |
| ShRNA2+siATG5     | 1.801±0.081    | 1.250±0.226    | 0.553±0.036     |
| <i>p</i>          | 0.001          | 0.151          | 0.003           |

D<sub>0</sub> is the average lethal dose, which is the dose required to hit each cell once. D<sub>q</sub> is a quasi-threshold dose, which refers to the ability to repair sublethal injury. SF<sub>2</sub> is the survival fraction at 2 Gy radiation dose. *P*<0.05 is supposed to indicate statistical significance.

Original western blots images

Figure.1A

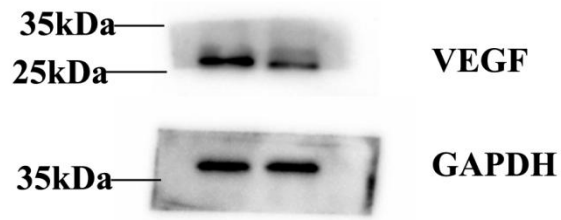

Figure.1B

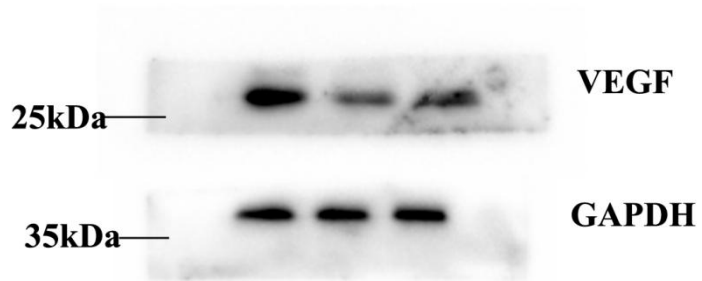

Figure.1C

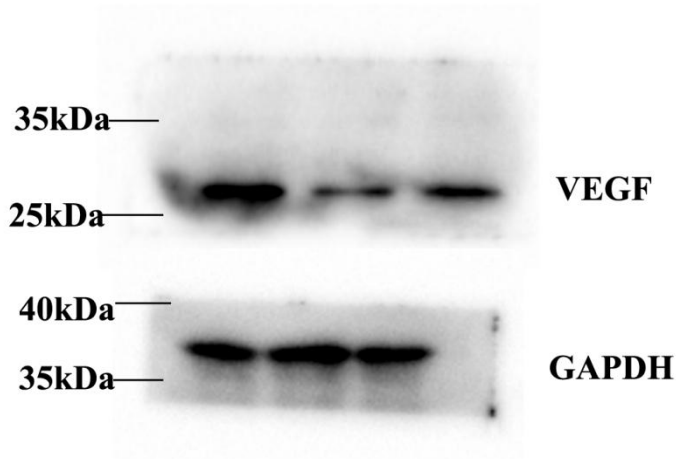

**Figure.3C**

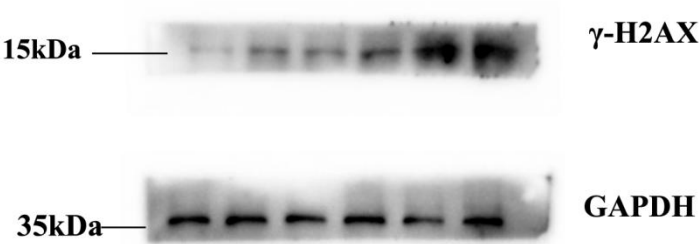

**Figure.4A**

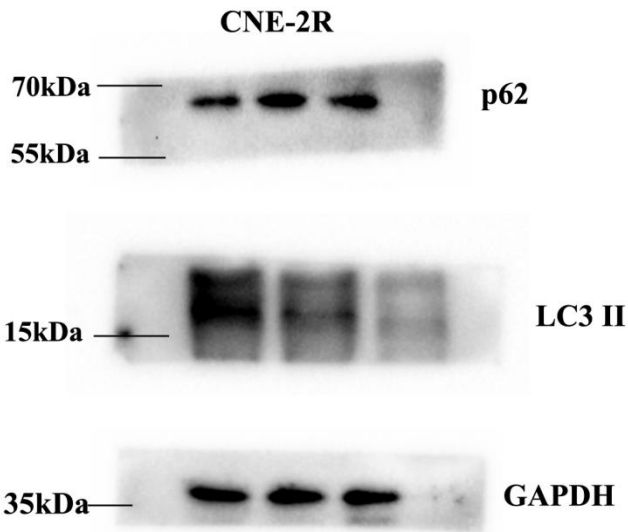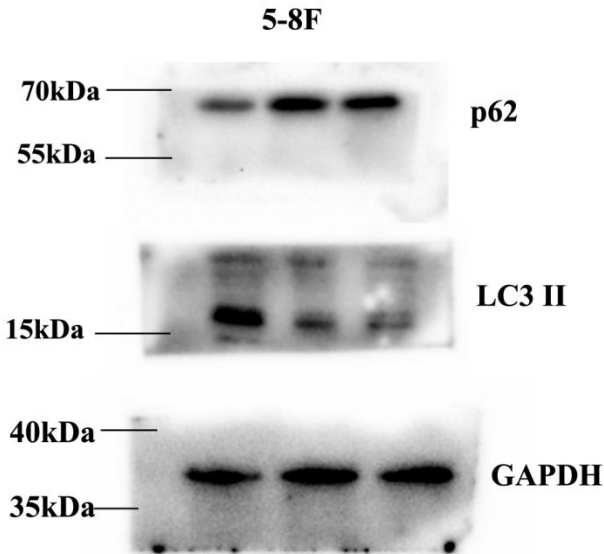

**Figure.5A**

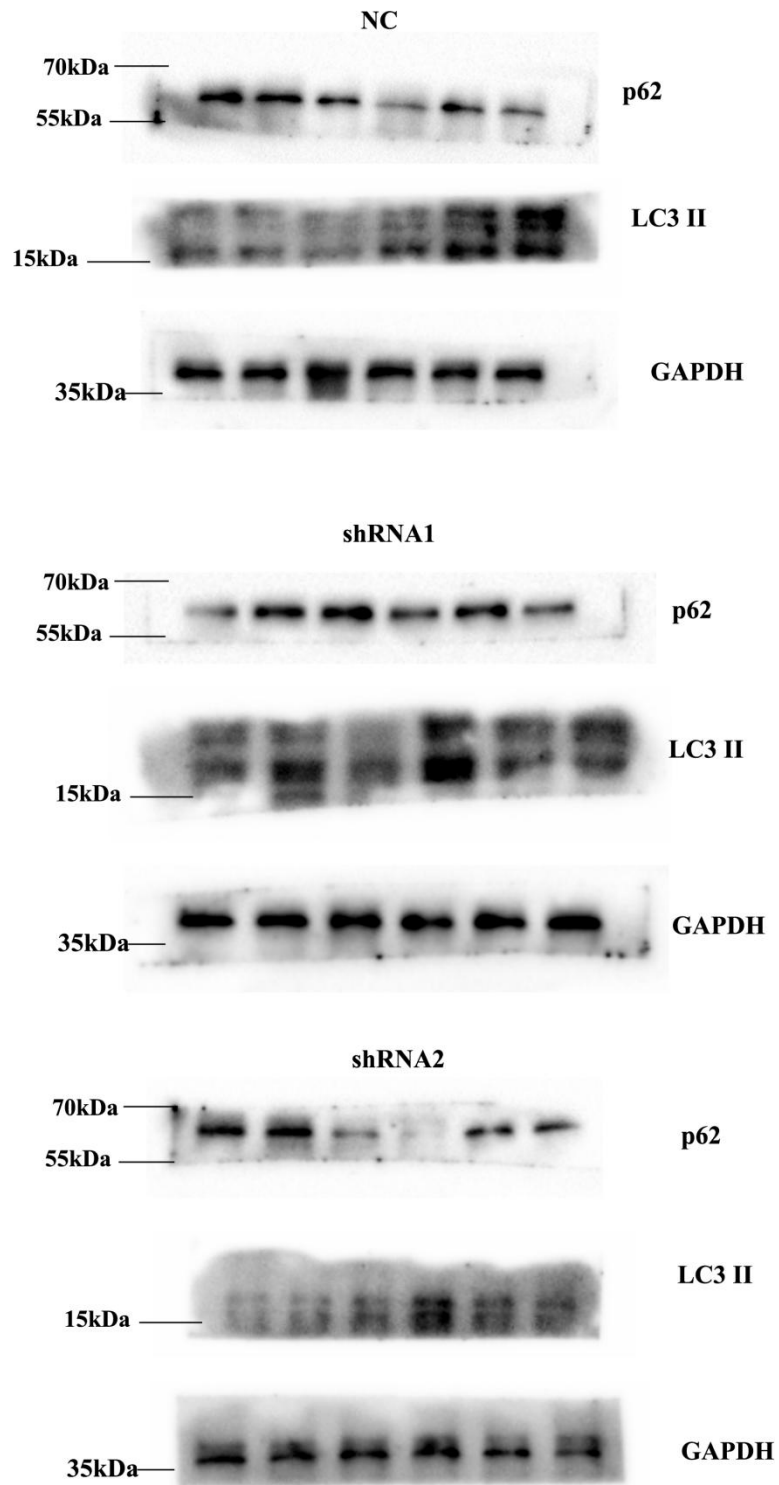

**Figure. 6A**

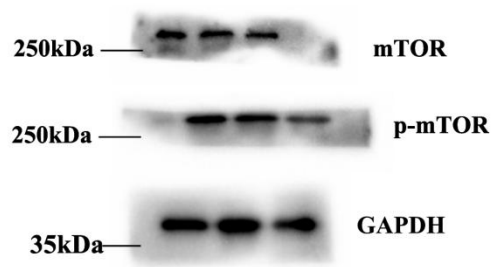

**Figure. 6B**

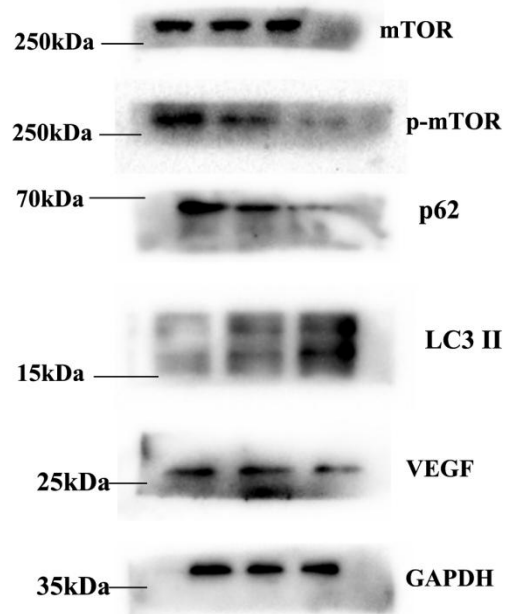

**Figure. 6C**

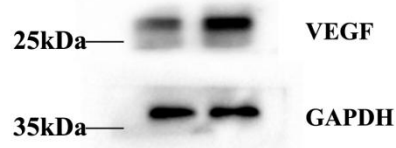

**Figure. 6E**

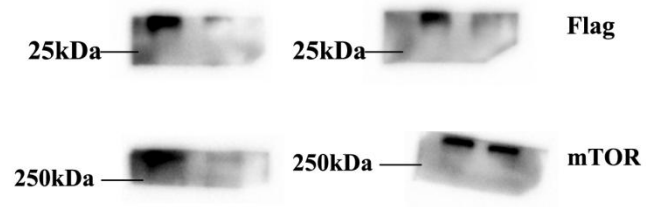

**Figure. S1**

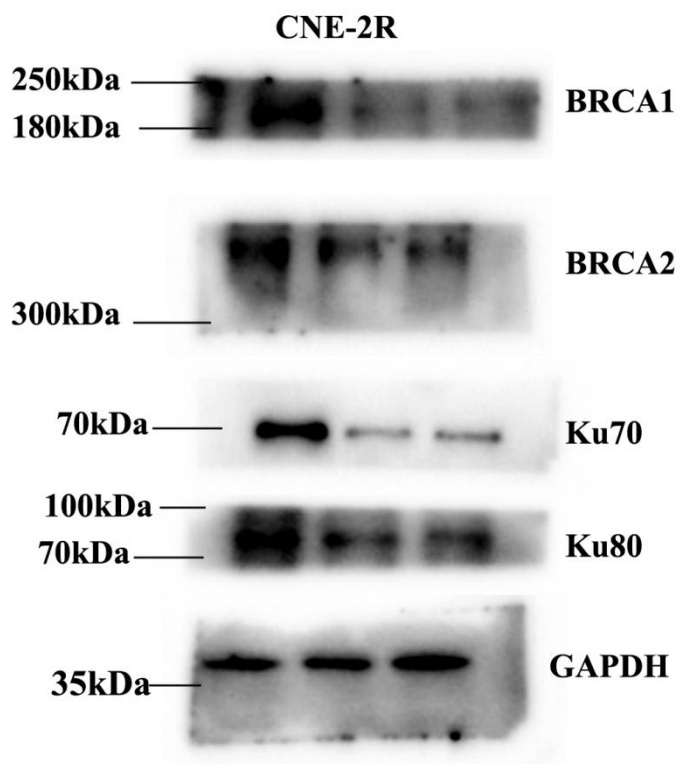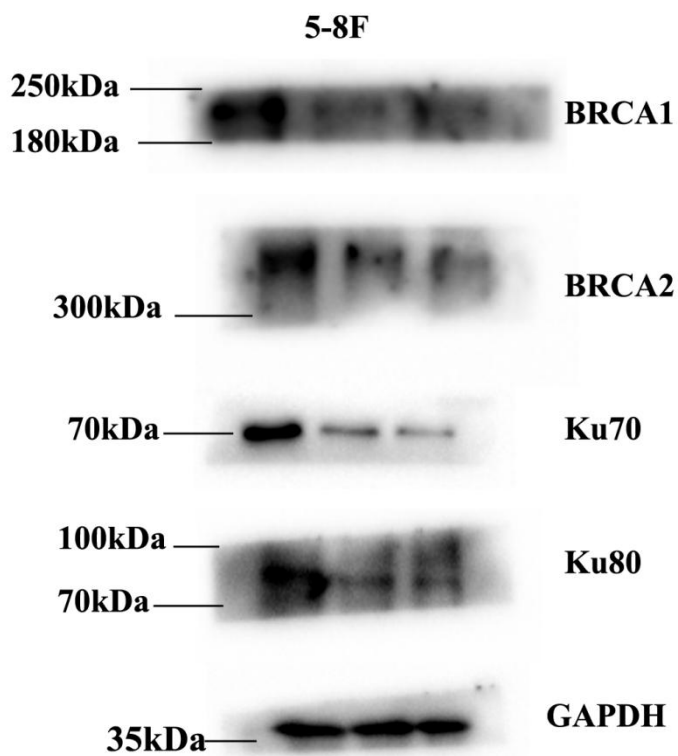

**Figure. S4A**

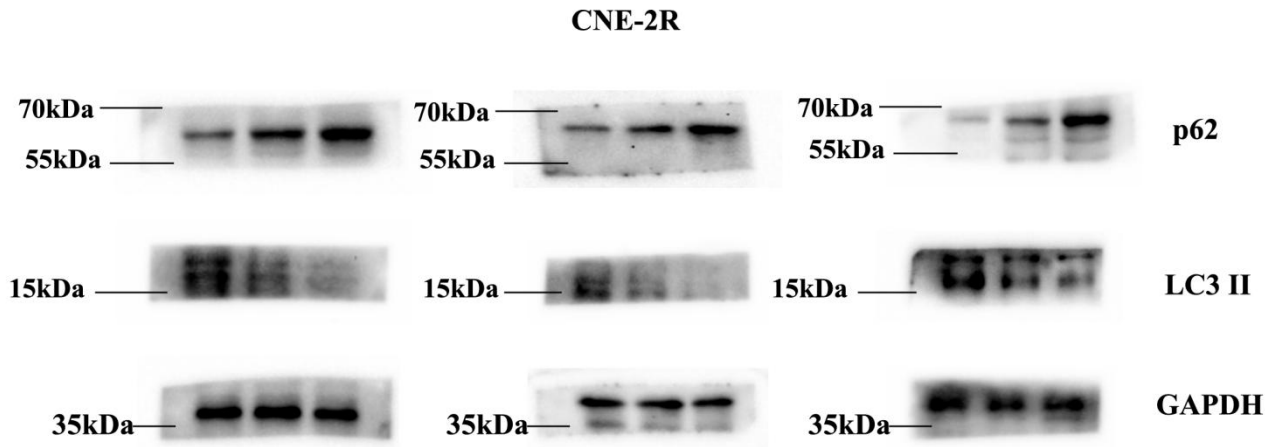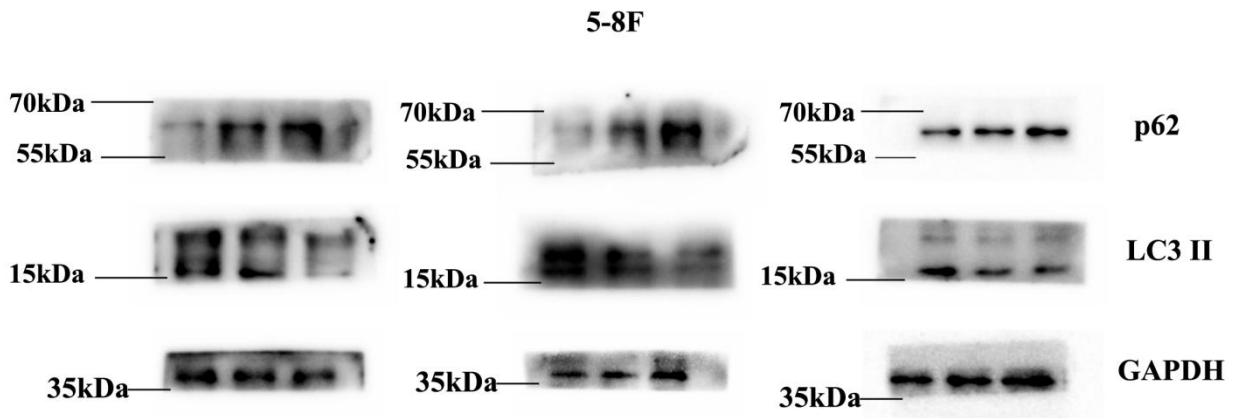

**Figure. S4B**

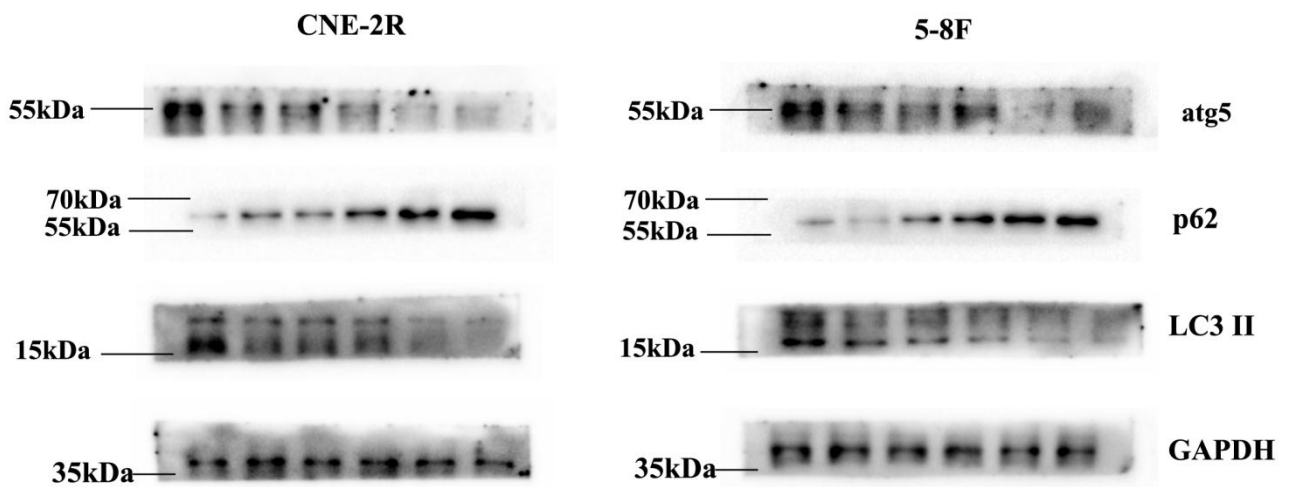

Supplement: 41598_2020_73310_MOESM1_ESM.pdf [file 41598_2020_73310_MOESM1_ESM.pdf]
